# Supplementary material for: Integrating multimodal and multiscale connectivity blueprints of the human cerebral cortex in health and disease
Source: PubMed Central journal article supplement (PMC10553842; doi:10.1371/journal.pbio.3002314), 2023-09-25
Supplement: pbio.3002314.s003.pdf [file pbio.3002314.s003.pdf]

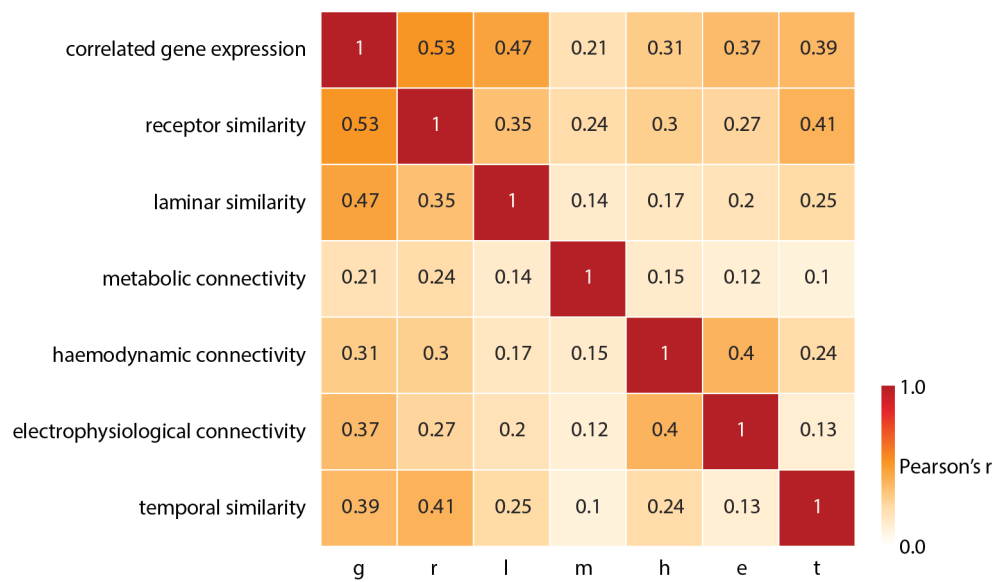

Figure S3. **Edge-wise correspondence between connectivity modes** | Pearson's correlation of the upper triangle of every pair of connectivity modes included in the analyses. The data underlying this figure can be found at [https://github.com/netneurolab/hansen\\_many\\_networks](https://github.com/netneurolab/hansen_many_networks).
