# Supplementary material for: Integrating multimodal and multiscale connectivity blueprints of the human cerebral cortex in health and disease
Source: PubMed Central journal article supplement (PMC10553842; doi:10.1371/journal.pbio.3002314), 2023-09-25
Supplement: pbio.3002314.s005.pdf [file pbio.3002314.s005.pdf]

a | all edges

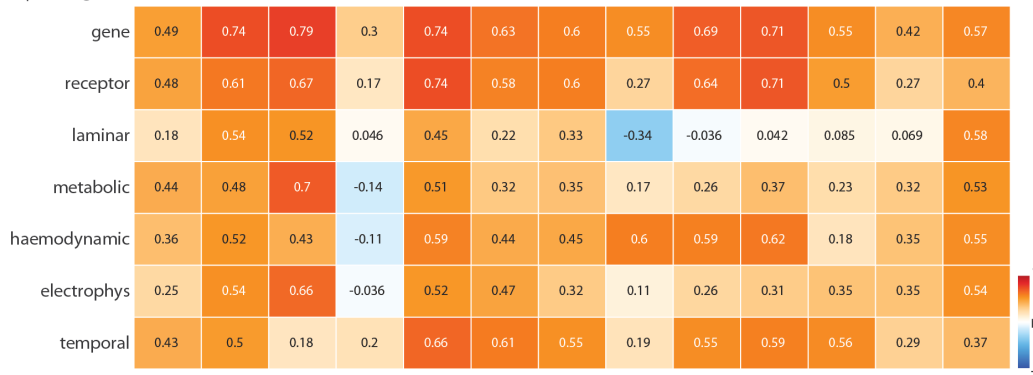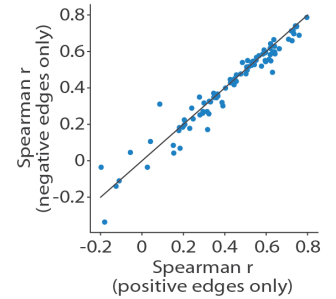

b | negative edges only

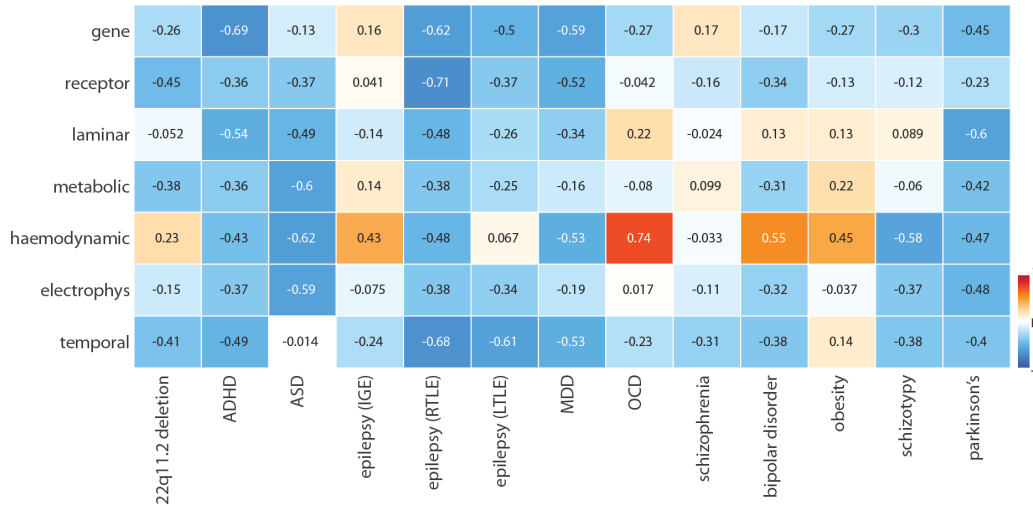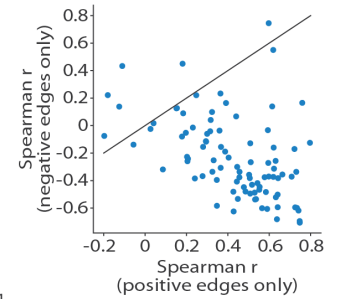

Figure S5. **Investigating the influence of negative edges in disease exposure** | We repeat the procedure in Fig. 4 but instead of retaining only positive edges, we retain (a) all edges, and (b) only negative edges. Scatter plots compare the original (positive edges only;  $x$ -axis) and updated ( $y$ -axis) Spearman's  $r$  correlation coefficients, with the identity line shown. The data underlying this figure can be found at [https://github.com/netneurolab/hansen\\_many\\_networks](https://github.com/netneurolab/hansen_many_networks).
