# Supplementary material for: Integrating multimodal and multiscale connectivity blueprints of the human cerebral cortex in health and disease
Source: PubMed Central journal article supplement (PMC10553842; doi:10.1371/journal.pbio.3002314), 2023-09-25
Supplement: pbio.3002314.s009.pdf [file pbio.3002314.s009.pdf]

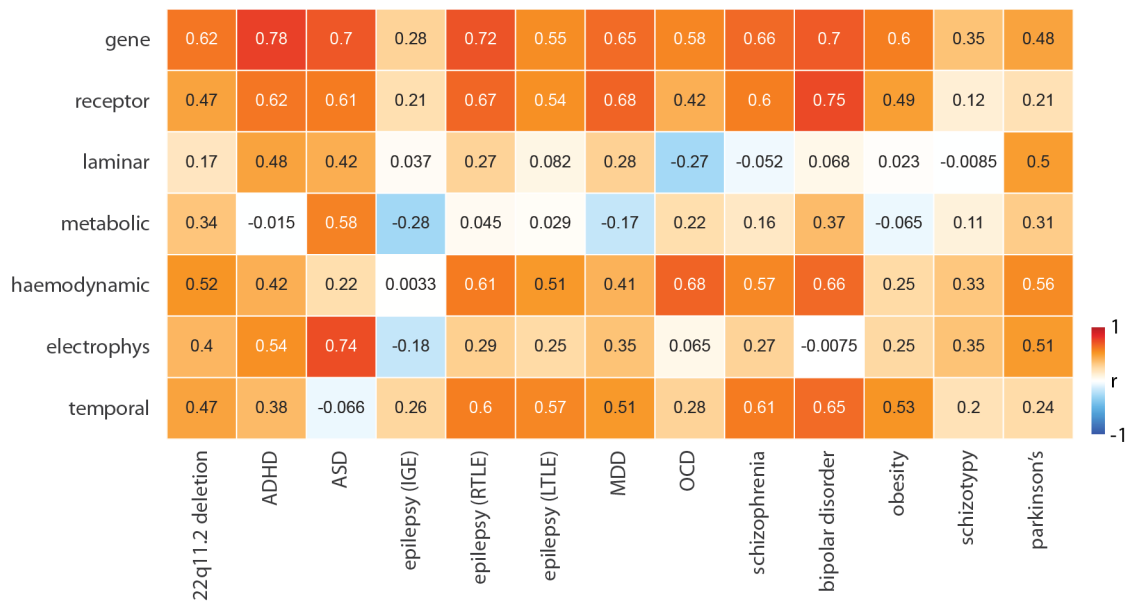

Figure S9. **Contributions of connectivity modes to disease vulnerability** | We repeat the procedure in Fig. 4 after regressing the exponential relationship with Euclidean distance (shown in Fig. 1b) from each connectivity mode. The data underlying this figure can be found at [https://github.com/netneurolab/hansen\\_many\\_networks](https://github.com/netneurolab/hansen_many_networks).
